# Supplementary material for: A Mendelian randomization study of the effect of type-2 diabetes on coronary heart disease
Source: PubMed Central journal article supplement (PMC4458864; doi:10.1038/ncomms8060), 2015-05-28
Supplement: ncomms8060-s1.pdf [file ncomms8060-s1.pdf]

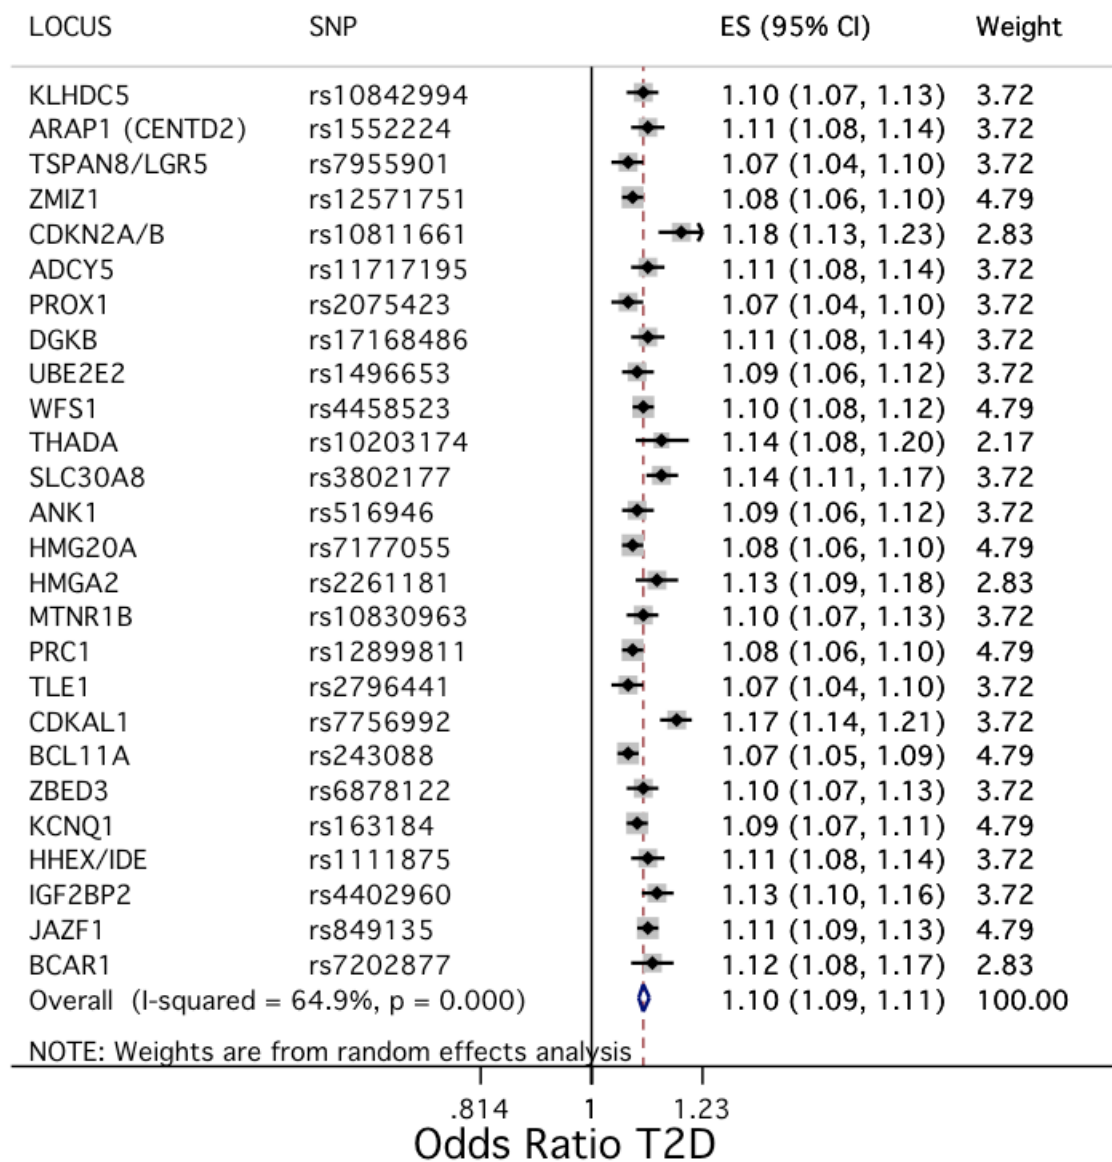

**Supplementary Figure 1. Random-effects meta-analysis of T2D risk alleles upon risk of T2D.** Pleiotropic SNPs (Table 1) have been removed. Shown for each SNP is the 95% confidence interval (black line segment) of the estimate and the inverse-variance weight (% proportional to the size of the grey square) in the random-effects meta-analysis.

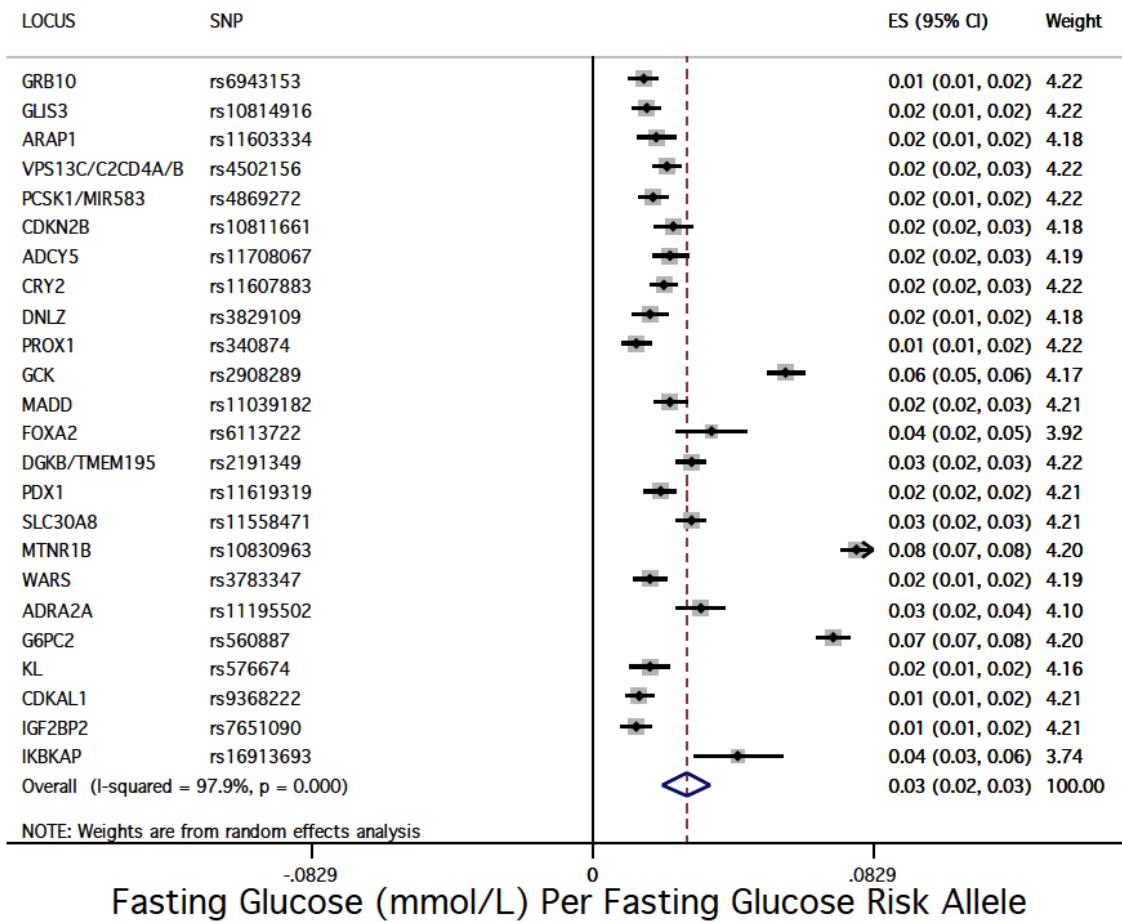

**Supplementary Figure 2. Random-effects meta-analysis of fasting glucose risk alleles for their effect on fasting glucose.** Pleiotropic SNPs (Table 2) have been removed. Also shown for each SNP is the 95% confidence interval (black line segment) of the estimate and the inverse-variance weight (% proportional to the size of the grey square) in the random-effects meta-analysis.

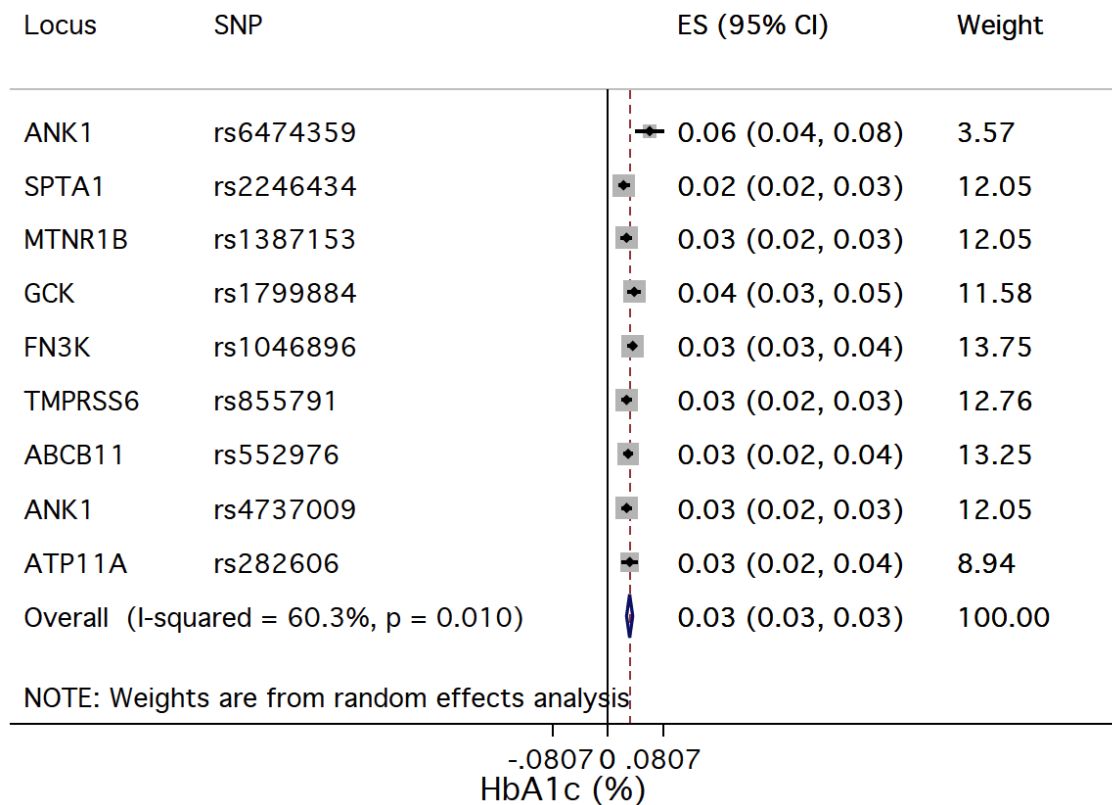

**Supplementary Figure 3. Random-effects meta-analysis of hemoglobin A1c (HbA1c) risk alleles for their effect on HbA1c.** Pleiotropic SNPs (Supplementary Table 5) have been removed. Also shown for each SNP is the 95% confidence interval (black line segment) of the estimate and the inverse-variance weight (% proportional to the size of the grey square) in the random-effects meta-analysis.

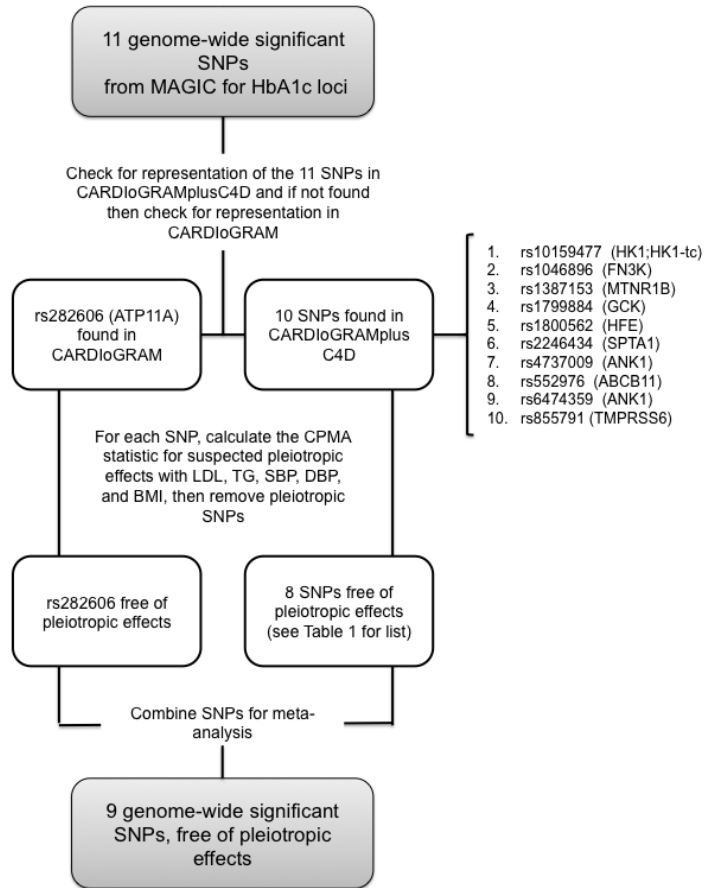

**Supplementary Figure 4. Selection and validation of hemoglobin A1c increasing SNPs used as instruments in the Mendelian randomization analysis of the effect of hemoglobin A1c on CHD risk.**

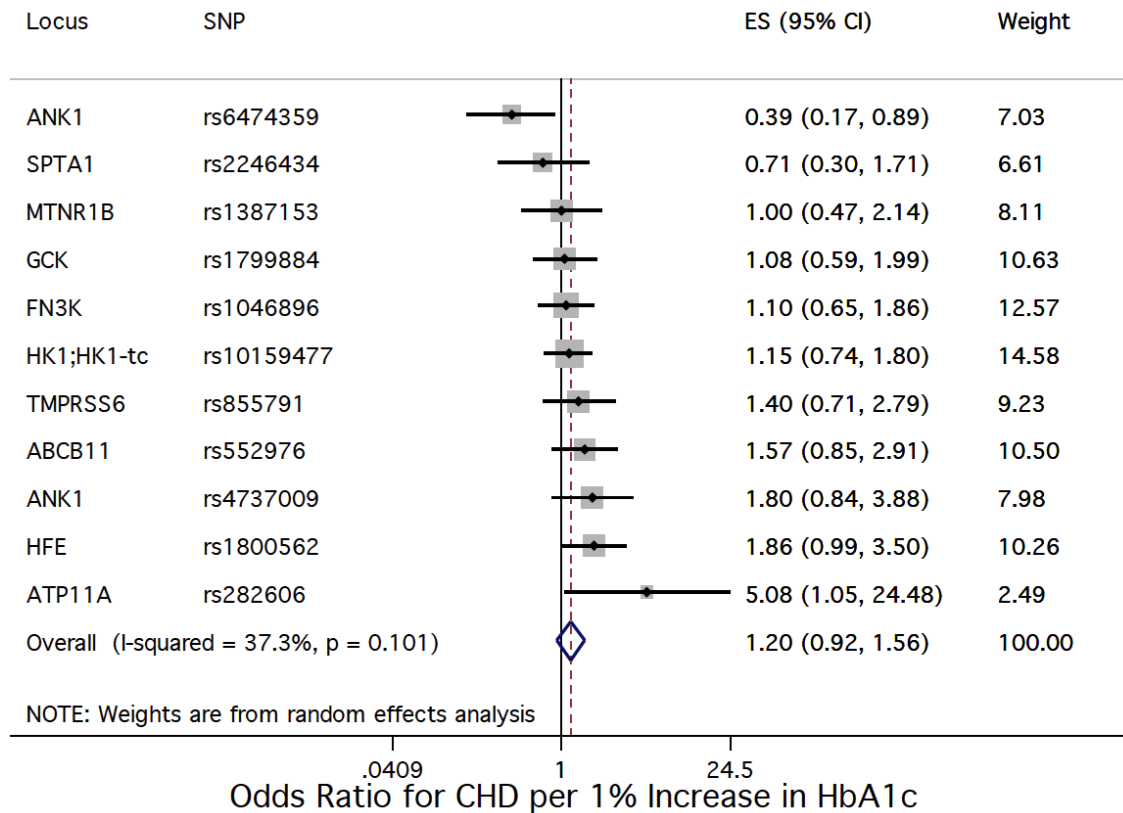

**Supplementary Figure 5. The Mendelian randomization estimate of the effect of HbA1c upon CHD using a random-effects model.** For each of the 9 non-pleiotropic SNPs (Supplementary Table 5), the Forest plot shows the estimate of the effect of the HbA1c risk allele upon CHD risk, as assessed for each SNP. Also shown for each SNP is the 95% confidence interval (black line segment) of the estimate and the inverse-variance weight (% proportional to the size of the grey square) in the random-effects meta-analysis.

**Supplementary Table 1: Random-effects estimate of the typical effect of risk-increasing variants for exposure traits on the exposure.**

| <b>Exposure</b>                                    | <b>Effect Size (95% CI)</b>              | <b>p-value</b> | <b>I<sup>2</sup> (95% CI)</b> |
|----------------------------------------------------|------------------------------------------|----------------|-------------------------------|
| T2D (all significant SNPS, n=37)                   | 1.11 (1.09-1.12)                         | 1.1E-49        | 88.9 (85.7-91.4)              |
| T2D (excluding pleiotropic SNPS, n=26)             | 1.10 (1.09-1.11)                         | 1.0E-97        | 64.9 (46.9-76.9)              |
| Fasting glucose (all significant SNPS, n=33)       | 0.025 mmol·L <sup>-1</sup> (0.020-0.031) | 1.8E-21        | 97.3 (96.8-97.8)              |
| Fasting glucose (excluding pleiotropic SNPS, n=24) | 0.028 mmol·L <sup>-1</sup> (0.021-0.035) | 9.7E-15        | 97.9 (97.5-98.3)              |
| Hemoglobin A1c (all significant SNPS, n=11)        | 0.036 % (0.030-0.043)                    | 1.7E-26        | 84.8 (74.5-91.0)              |
| Hemoglobin A1c (excluding pleiotropic SNPS, n=9)   | 0.030 % (0.026-0.035)                    | 1.0E-43        | 60.3 (17.5-80.9)              |

**Supplementary Table 2A: Association of SNPs from the T2D reference set with confounder traits.**

| Locus          | SNP        | LDL | TG | BMI-M | BMI-F | DBP | SBP | CPMA |
|----------------|------------|-----|----|-------|-------|-----|-----|------|
| ADAMTS9        | rs6795735  | +   | +  | +     | +     |     |     |      |
| ADCY5          | rs11717195 | +   | +  | -     | -     |     |     |      |
| ANK1           | rs516946   | +   | +  | +     | +     |     |     |      |
| ANKRD55        | rs459193   | +   | +  | +     | +     |     |     |      |
| ARAP1 (CENTD2) | rs1552224  | +   | +  | -     | -     |     |     |      |
| BCAR1          | rs7202877  | +   | +  | -     | -     |     |     |      |
| BCL11A         | rs243088   | +   | +  | +     | +     |     |     |      |
| CDKAL1         | rs7756992  | +   | +  | +     | +     |     |     |      |
| CDKN2A/B       | rs10811661 | +   | +  | +     | -     |     |     |      |
| CILP2          | rs10401969 | +   | +  | +     | +     |     |     |      |
| DGKB           | rs17168486 | +   | +  | +     | -     |     |     |      |
| FTO            | rs9936385  | +   | +  | -     | -     |     |     |      |
| GRB14          | rs13389219 | +   | +  | +     | +     |     |     |      |
| HHEX/IDE       | rs1111875  | +   | +  | -     | +     |     |     |      |
| HMG20A         | rs7177055  | +   | +  | -     | +     |     |     |      |
| HMG2           | rs2261181  | +   | +  | -     | -     |     |     |      |
| IGF2BP2        | rs4402960  | +   | +  | -     | -     |     |     |      |
| IRS1           | rs2943640  | +   | +  | +     | +     |     |     |      |
| JAZF1          | rs849135   | +   | +  | +     | +     |     |     |      |
| KCNJ11         | rs5215     | +   | +  | +     | +     |     |     |      |
| KCNQ1          | rs163184   | +   | +  | +     | -     |     |     |      |
| KLHDC5         | rs10842994 | +   | +  | -     | +     |     |     |      |
| MC4R           | rs12970134 | +   | +  | +     | +     |     |     |      |
| MTNR1B         | rs10830963 | +   | +  | -     | -     |     |     |      |
| PPARG          | rs1801282  | +   | +  | -     | -     |     |     |      |
| PRC1           | rs12899811 | +   | +  | -     | +     |     |     |      |
| PROX1          | rs2075423  | +   | +  | +     | +     |     |     |      |
| SLC30A8        | rs3802177  | +   | +  | +     | +     |     |     |      |
| SPRY2          | rs1359790  | +   | +  | +     | -     |     |     |      |
| TCF7L2         | rs7903146  | +   | +  | -     | -     |     |     |      |
| THADA          | rs10203174 | +   | +  | +     | +     |     |     |      |
| TLE1           | rs2796441  | +   | +  | +     | -     |     |     |      |
| TSPAN8/LGR5    | rs7955901  | +   | +  | -     | +     |     |     |      |
| UBE2E2         | rs1496653  | +   | +  | -     | -     |     |     |      |
| WFS1           | rs4458523  | +   | +  | -     | -     |     |     |      |
| ZBED3          | rs6878122  | +   | +  | +     | +     |     |     |      |
| ZMIZ1          | rs12571751 | +   | +  | +     | +     |     |     |      |

Pleiotropic pathway color legend: white ( $p > 0.05$ ), light gray ( $0.001 < p < 0.05$ ), dark gray ( $0.000001 < p < 0.001$ ), black ( $p < 0.000001$ ); CPMA: Black represents CPMA p-value  $< 0.01$  for chi-square test with 1 degree of freedom; +/- signs indicate direction of effect. Directions of effect were not available for DBP or SBP.

**Supplementary Table 2B: Association of SNPs from the fasting glucose reference set with confounder traits.**

| Locus           | SNP        | LDL | TG | BMI-M | BMI-F | DBP | SBP | CPMA |
|-----------------|------------|-----|----|-------|-------|-----|-----|------|
| ADCY5           | rs11708067 | +   | +  | -     | -     |     |     |      |
| ADRA2A          | rs11195502 | +   | +  | +     | +     |     |     |      |
| AMT             | rs11715915 | +   | +  | -     | -     |     |     |      |
| ARAP1           | rs11603334 | +   | +  | +     | +     |     |     |      |
| CDKAL1          | rs9368222  | +   | +  | -     | -     |     |     |      |
| CDKN2B          | rs10811661 | +   | +  | +     | -     |     |     |      |
| CRY2            | rs11607883 | +   | +  | +     | -     |     |     |      |
| DGKB/TMEM195    | rs2191349  | +   | +  | +     | -     |     |     |      |
| DNLZ            | rs3829109  | +   | +  | -     | -     |     |     |      |
| FADS1           | rs174576   | +   | +  | +     | +     |     |     |      |
| FOXA2           | rs6113722  | +   | +  | +     | +     |     |     |      |
| G6PC2           | rs560887   | +   | +  | +     | +     |     |     |      |
| GCK             | rs2908289  | +   | +  | +     | -     |     |     |      |
| GCKR            | rs780094   | +   | +  | -     | -     |     |     |      |
| GIPR            | rs2302593  | +   | +  | +     | +     |     |     |      |
| GLIS3           | rs10814916 | +   | +  | -     | +     |     |     |      |
| GRB10           | rs6943153  | +   | +  | -     | +     |     |     |      |
| IGF2BP2         | rs7651090  | +   | +  | +     | +     |     |     |      |
| IKBKAP          | rs16913693 | +   | +  | -     | +     |     |     |      |
| KL              | rs576674   | +   | +  | +     | +     |     |     |      |
| MADD            | rs11039182 | +   | +  | +     | +     |     |     |      |
| MTNR1B          | rs10830963 | +   | +  | -     | -     |     |     |      |
| P2RX2           | rs10747083 | +   | +  | +     | +     |     |     |      |
| PCSK1           | rs4869272  | +   | +  | -     | -     |     |     |      |
| PDX1            | rs11619319 | +   | +  | +     | +     |     |     |      |
| PPP1R3B         | rs983309   | +   | +  | -     | +     |     |     |      |
| PROX1           | rs340874   | +   | +  | -     | -     |     |     |      |
| SLC2A2          | rs1280     | +   | +  | +     | -     |     |     |      |
| SLC30A8         | rs11558471 | +   | +  | -     | -     |     |     |      |
| TCF7L2          | rs7903146  | +   | +  | -     | -     |     |     |      |
| TOP1            | rs6072275  | +   | +  | -     | -     |     |     |      |
| VPS13C/C2CD4A/B | rs4502156  | +   | +  | -     | -     |     |     |      |
| WARS            | rs3783347  | +   | +  | -     | -     |     |     |      |

Pleiotropic pathway color legend: white ( $p > 0.05$ ), light gray ( $0.001 < p < 0.05$ ), dark gray ( $0.000001 < p < 0.001$ ), black ( $p < 0.000001$ ); CPMA: Black represents CPMA p-value  $< 0.01$  for chi-square test with 1 degree of freedom; +/- signs indicate direction of effect. Directions of effect were not available for DBP or SBP.



**Supplementary Table 2C: Association of SNPs from the HbA1c reference set with confounder traits.**

| Locus      | SNP        | LDL | TG | BMI-M | BMI-F | DBP | SBP | CPMA |
|------------|------------|-----|----|-------|-------|-----|-----|------|
| ABCB11     | rs552976   | +   | +  | +     | +     |     |     |      |
| ANK1       | rs4737009  | +   | +  | -     | +     |     |     |      |
| ANK1       | rs6474359  | +   | +  | -     | +     |     |     |      |
| ATP11A     | rs282606   | +   | +  | -     | +     |     |     |      |
| FN3K       | rs1046896  | +   | +  | +     | +     |     |     |      |
| GCK        | rs1799884  | +   | +  | +     | -     |     |     |      |
| HFE        | rs1800562  | +   | +  | -     | -     |     |     |      |
| HK1;HK1-tc | rs10159477 | +   | +  | -     | -     |     |     |      |
| MTNR1B     | rs1387153  | +   | +  | +     | +     |     |     |      |
| SPTA1      | rs2246434  | +   | +  | +     | +     |     |     |      |
| TMPRSS6    | rs855791   | +   | +  | +     | -     |     |     |      |

**Supplementary Table 3: Fixed-effects model estimates for the effect of T2D and fasting glucose on CHD risk.**

| <b>Instrument Set</b>                              | <b>Effect Size (95% CI)</b> | <b>p-value</b> |
|----------------------------------------------------|-----------------------------|----------------|
| T2D (all significant SNPs, n=37)                   | 1.10 (1.07-1.13)            | 4.0E-11        |
| T2D (excluding pleiotropic SNPs, n=26)             | 1.11 (1.06-1.15)            | 3.5E-07        |
| Fasting glucose (all significant SNPs, n=33)       | 1.21 (1.07-1.39)            | 2.6E-03        |
| Fasting glucose (excluding pleiotropic SNPs, n=24) | 1.15 (1.00-1.32)            | 5.3E-02        |

### Supplementary Table 4. Physiologic clusters of loci identified for T2D.

Previously identified clusters were labeled as insulin resistance (IR), hyperglycemic (HG), proinsulin processing (PI), unclassified (UC), and beta-cell dysfunction (BC).

| Locus          | SNP        | Physiologic cluster | Genome-wide significant (p < 5x10 <sup>-8</sup> ) | Pleiotropic effect | Included in study or reason for exclusion                  |
|----------------|------------|---------------------|---------------------------------------------------|--------------------|------------------------------------------------------------|
| ADCY5          | rs11717195 | BC                  | Yes                                               | No                 | Included                                                   |
| CDKAL1         | rs7756992  | BC                  | Yes                                               | No                 | Included                                                   |
| CDKN2A/B       | rs10811661 | BC                  | Yes                                               | No                 | Included                                                   |
| DGKB           | rs17168486 | BC                  | Yes                                               | No                 | Included                                                   |
| HHEX/IDE       | rs1111875  | BC                  | Yes                                               | No                 | Included                                                   |
| PROX1          | rs2075423  | BC                  | Yes                                               | No                 | Included                                                   |
| SLC30A8        | rs3802177  | BC                  | Yes                                               | No                 | Included                                                   |
| THADA          | rs10203174 | BC                  | Yes                                               | No                 | Included                                                   |
| TCF7L2         | rs7903146  | BC                  | Yes                                               | Yes                | Suspected pleiotropic effects                              |
| MTNR1B         | rs10830963 | HG                  | Yes                                               | No                 | Included                                                   |
| GCK            | rs10278336 | HG                  | No                                                | No                 | Not genome-wide significant                                |
| GCKR           | rs780094   | IR                  | No                                                | Yes                | Not genome-wide significant; suspected pleiotropic effects |
| KLF14          | rs13233731 | IR                  | No                                                | Yes                | Not genome-wide significant; suspected pleiotropic effects |
| IRS1           | rs2943640  | IR                  | Yes                                               | Yes                | Suspected pleiotropic effects                              |
| PPARG          | rs1801282  | IR                  | Yes                                               | Yes                | Suspected pleiotropic effects                              |
| ARAP1 (CENTD2) | rs1552224  | PI                  | Yes                                               | No                 | Included                                                   |
| BCL11A         | rs243088   | UC                  | Yes                                               | No                 | Included                                                   |
| HMGA2          | rs2261181  | UC                  | Yes                                               | No                 | Included                                                   |
| IGF2BP2        | rs4402960  | UC                  | Yes                                               | No                 | Included                                                   |
| JAZF1          | rs849135   | UC                  | Yes                                               | No                 | Included                                                   |
| KCNQ1          | rs163184   | UC                  | Yes                                               | No                 | Included                                                   |
| PRC1           | rs12899811 | UC                  | Yes                                               | No                 | Included                                                   |
| TSPAN8/LGR5    | rs7955901  | UC                  | Yes                                               | No                 | Included                                                   |
| WFS1           | rs4458523  | UC                  | Yes                                               | No                 | Included                                                   |
| ZBED3          | rs6878122  | UC                  | Yes                                               | No                 | Included                                                   |
| HNF1B (TCF2)   | rs11651052 | UC                  | Yes                                               | No                 | Not found in outcome                                       |
| CDC123/CAMK1D  | rs11257655 | UC                  | No                                                | No                 | Not genome-wide significant                                |
| DUSP8          | rs2334499  | UC                  | No                                                | No                 | Not genome-wide significant                                |
| HNF1A (TCF1)   | rs12427353 | UC                  | No                                                | No                 | Not genome-wide significant                                |
| NOTCH2         | rs10923931 | UC                  | No                                                | No                 | Not genome-wide significant                                |
| TLE4           | rs17791513 | UC                  | No                                                | No                 | Not genome-wide significant                                |
| ZFAND6         | rs11634397 | UC                  | No                                                | No                 | Not genome-wide significant                                |
| TP53INP1       | rs7845219  | UC                  | No                                                | Yes                | Not genome-wide significant; suspected pleiotropic effects |
| ADAMTS9        | rs6795735  | UC                  | Yes                                               | Yes                | Suspected pleiotropic effects                              |
| KCNJ11         | rs5215     | UC                  | Yes                                               | Yes                | Suspected pleiotropic effects                              |

Pleiotropic pathway color legend: white (p > 0.05), light gray (0.001 < p < 0.05), dark gray (0.000001 < p < 0.001), black (p < 0.000001); CPMA: Black represents CPMA p-value < 0.01 for chi-square test with 1 degree of freedom; +/- signs indicate direction of effect. Directions of effect were not available for DBP or SBP.

**Supplementary Table 5: Characteristics of SNPs considered for use in Mendelian randomization analysis of the effect of HbA1c on CHD risk.** Reported p-values are for allelic association of SNPs with each trait.

| Locus      | SNP        | EA | NEA | OR HbA1c | p-value HbA1c | OR CHD | p-value CHD | Pleiotropic Effect |
|------------|------------|----|-----|----------|---------------|--------|-------------|--------------------|
| ABCB11     | rs552976   | G  | A   | 1.03     | 8.2E-18       | 1.01   | 1.5E-01     | No                 |
| GCK        | rs1799884  | T  | C   | 1.04     | 1.5E-20       | 1.00   | 8.1E-01     | No                 |
| MTNR1B     | rs1387153  | T  | C   | 1.03     | 4.0E-11       | 1.00   | 9.9E-01     | No                 |
| ANK1       | rs4737009  | A  | G   | 1.03     | 6.1E-12       | 1.02   | 1.3E-01     | No                 |
| ANK1       | rs6474359  | T  | C   | 1.06     | 1.2E-08       | 0.94   | 2.6E-02     | No                 |
| ATP11A     | rs282606   | A  | G   | 1.03     | 1.2E-08       | 1.05   | 4.3E-02     | No                 |
| FN3K       | rs1046896  | T  | C   | 1.04     | 1.6E-26       | 1.00   | 7.2E-01     | No                 |
| SPTA1      | rs2246434  | A  | G   | 1.02     | 6.0E-09       | 0.99   | 4.5E-01     | No                 |
| TMPRSS6    | rs855791   | A  | G   | 1.03     | 2.7E-14       | 1.01   | 3.3E-01     | No                 |
| HFE        | rs1800562  | G  | A   | 1.07     | 2.6E-20       | 1.04   | 5.3E-02     | Yes                |
| HK1;HK1-tc | rs10159477 | G  | A   | 1.06     | 3.2E-25       | 1.01   | 5.3E-01     | Yes                |

EA = Effect Allele, NEA = Non-Effect Allele. Pleiotropic Effect: "Yes" indicates that the SNP was associated with at least one confounding trait in the CPMA analysis. See Supplementary Table 1 for a full description of these pleiotropic associations. Note that the OR for CHD is not weighted for the effect of each SNP upon HbA1c. Figures report the OR for CHD weighted by their effect on HbA1c.

**Supplementary Table 6: Random-effects model estimates for the effect of hemoglobin A1c on CHD risk.** Each p-value is for the MR analyses.

| Instrument Set                                   | Effect Size (95% CI) | p-value | I <sup>2</sup> (95% CI) |
|--------------------------------------------------|----------------------|---------|-------------------------|
| Hemoglobin A1c (all significant SNPs, n=11)      | 1.20 (0.92-1.56)     | 1.7E-01 | 37.3 (0-69.2)           |
| Hemoglobin A1c (excluding pleiotropic SNPs, n=9) | 1.14 (0.82-1.57)     | 4.3E-01 | 42.3 (0-73.4)           |

**Supplementary Table 7: Fixed-effects model estimates for the effect of hemoglobin A1c on CHD risk.** Each p-value is for the MR analyses.

| Instrument Set                          | Effect Size (95% CI) | p-value |
|-----------------------------------------|----------------------|---------|
| HbA1c (all significant SNPs, n=11)      | 1.20 (0.98-1.47)     | 7.2E-02 |
| HbA1c (excluding pleiotropic SNPs, n=9) | 1.14 (0.90-1.45)     | 2.8E-01 |

### **Supplementary Note 1. Typical effects risk-increasing genetic variants.**

In this section, we present the random-effects estimates of the typical effect of risk-increasing genetic variants for T2D, fasting glucose, and hemoglobin A1c (HbA1c). Because of the high degree of heterogeneity in effect sizes between variants for each of the exposure traits, the random-effects estimates for the typical genetic effect on each exposure trait approaches that of an unweighted average of the individual effect-sizes.

We used a random-effects model to estimate the effect of a typical T2D risk-increasing variant upon T2D risk. Using the full set of genome-wide significant T2D risk-increasing alleles (n=37), we estimated that the typical odds ratio of a T2D risk-increasing variant upon T2D risk to be OR = 1.11 per allele (95%CI: 1.09-1.12);  $p = 1.0 \times 10^{-49}$  for the MR analysis;  $I^2 = 88.9$  (95%CI: 86-92). Using the subset of non-pleiotropic variants (n=26), we estimated the odds ratio to be OR = 1.10 per allele (95%CI: 1.09-1.11),  $P = 1 \times 10^{-97}$  for the MR analysis;  $I^2 = 64.9$  (46.8-76.9).

**(Supplementary Table 1, Supplementary Fig. 1).** As expected, the unweighted average effect for the both the full set of 37 variants and the set of 26 non-pleiotropic variants yielded estimates similar to the random-effects estimates.

We used a random-effects model to estimate the typical effect of fasting glucose-increasing SNPs on fasting glucose in non-diabetic individuals. Using the full set of genome-wide significant SNPs (n=33), we estimated the typical effect size to be 0.025 mmol/L per allele [95%CI: 0.021 - 0.031 mmol/L FG per allele],  $P = 1.8 \times 10^{-21}$  for the MR analysis;  $I^2 = 97.4$  (95%CI: 96.8-97.8). Using the subset of non-pleiotropic variants (n = 24), we estimated the typical effect size to be 0.028 mmol/L FG per allele [95%CI 0.021-0.035 mmol/L FG per allele];  $P = 9.7 \times 10^{-15}$  for the MR analysis;  $I^2 = 97.9$  (97.5-98.3). **(Supplementary Table 1, Supplementary Fig. 2).** As expected, the unweighted average effect for the both the full set of 33 variants and the set of 24 non-pleiotropic variants yielded estimates similar to the random-effects estimates.

*Typical effect of HbA1c variants.*

We used a random-effects model to estimate the typical effect of HbA1c-increasing SNPs on HbA1c in non-diabetic individuals. Using the full set of genome-wide significant variants (n=11), we estimated the typical effect size to be 0.036% per allele (95%CI: 0.030-0.043% per allele),  $P = 1.7 \times 10^{-26}$  for the MR analysis;  $I^2 = 84.8$  (95%CI: 74.5-91.0). Using the subset of non-pleiotropic effects (n = 9), we estimated the typical effect size to be 0.030% mmol/L per allele (95%CI 0.026-0.035 mmol/L per allele);  $P = 1.0 \times 10^{-43}$  for the MR analysis;  $I^2 = 60.3$  (17.5-80.9).

**(Supplementary Table 1, Supplementary Fig. 3).** As expected, the unweighted average effect for the both the full set of 11 variants and the subset of 9 non-pleiotropic variants yielded estimates similar to the random-effects estimates.

### **Supplementary Note 2. Hemoglobin A1c and CHD risk**

We identified 11 genetic variants found to be significantly associated ( $P < 5 \times 10^{-8}$ ) with HbA1c levels **(Supplementary Table 5, Supplementary Fig. 4)** using data from the MAGIC consortium's most recent GWAS (n = 133,010 non-diabetic individuals).<sup>5</sup> Of these variants, 9 were found to be free of pleiotropy.

Using the full set of genome-wide significant variants (n=11), we carried out a random-effects meta-analysis of the instrumental-variables estimates associated with each SNP. This yielded an estimated effect of OR = 1.2 per 1% increase in HbA1c (95% CI: 0.92-1.56),  $P = 0.17$  for the MR analysis,  $I^2: 37.3$  (0-69.2). Using the non-pleiotropic variants (n=9), we carried out a random-effects meta-analysis of individual instrumental-variables estimates to obtain an MR estimate. This yielded an estimated effect of OR: 1.14 ds per 1% increase in HbA1c (95%CI: 0.82-1.57), p-value = 0.43 for the MR analysis,  $I^2: 42.3$  (95%CI: 0-73.4) **(Supplementary Table 6, Supplementary Fig. 5)**. Neither the analysis using the full set of significant variants, nor the analysis using the subset of non-pleiotropic variants produced results that were statistically significant at the 95% confidence level. Fixed-effects models yielded non-significant estimates similar to those of the random-effects models **(Supplementary Table 7)**.

### **Supplementary Note 3. Exposure to T2D in the CARDIoGRAMplusC4D meta-analysis.**

The mean age of individuals in the cohorts included in the CARDIoGRAMplusC4D meta-analysis ranged between 45 years and 75.6 years, with a mean of 58.2 years (standard deviation 6.3 years) and an inverse-population-size weighted mean age across cohorts of 59.4 years.<sup>1</sup> For those cohorts for which risk-factor data are publicly available (27 of 37 cohorts), the percentage of patients with T2D ranges from 5% to 42%. The mean age at diagnosis of T2D among white American individuals is 58 years,<sup>2</sup> with a substantial number of patients being diagnosed by the age of 50 years and many with many patients having untreated diabetes for years before diagnosis. Based on these data we feel that, on average, individuals within CARDIoGRAMplusC4D were old enough to have developed T2D.

By comparison, in the largest meta-analysis of observational studies to date examining the effect of T2D on cardiovascular disease,<sup>3</sup> encompassing 102 prospective studies and ~ 700 000 individuals, the mean age was 52 yrs. Moreover, a significant finding from this study was that the hazard ratios for coronary heart disease in patients with diabetes were significantly higher at 40–59 years than at 70 years or older.

It is also important to note that exposure to a genetic risk factor for T2D will be present from the time of conception. Consequently, it invariably precedes the disease outcomes that develop in adulthood. Thus, although the design of a Mendelian randomization study is retrospective, the genetic exposure is known, on biological grounds, to precede the outcome.

Both the DIAGRAM and CARDIoGRAMplusC4D sample populations are composed predominantly of individuals of European descent, and hence are largely drawn from the same overall population, justifying our use of separately ascertained effect-sizes. Moreover, a recent trans-ethnic meta-analysis of T2D GWAS studies<sup>4</sup> demonstrates the robustness of the leading DIAGRAM results across most human populations, further supporting our use of effect-sizes determined from the DIAGRAM data-set. Therefore, the available data suggest strongly that the

T2D risk alleles identified in the most recent DIAGRAM publication confer risk of T2D in different cohorts, as well as even different ancestries.

### Supplementary References

1. CARDIoGRAMplusC4D Consortium *et al.* Large-scale association analysis identifies new risk loci for coronary artery disease. *Nature Genetics* **45**, 25–33 (2013).
2. Narayan, K. M. V., Boyle, J. P., Thompson, T. J., Sorensen, S. W. & Williamson, D. F. Lifetime Risk for Diabetes Mellitus in the United States. *JAMA* **290**, 1884–1890 (2003).
3. The Emerging Risk Factors Collaboration. Diabetes mellitus, fasting blood glucose concentration, and risk of vascular disease: a collaborative meta-analysis of 102 prospective studies. *The Lancet* **375**, 2215–2222 (2010).
4. DIABetes Genetics Replication And Meta-analysis (DIAGRAM) Consortium *et al.* Genome-wide trans-ancestry meta-analysis provides insight into the genetic architecture of type 2 diabetes susceptibility. *Nature Genetics* **46**, 234–244 (2014).
5. Scott, R. A. *et al.* Large-scale association analyses identify new loci influencing glycemic traits and provide insight into the underlying biological pathways. *Nature Genetics* **44**, 991–1005 (2012).
